# Supplementary material for: Permethrin Resistance in Aedes aegypti Affects Aspects of Vectorial Capacity
Source: PubMed Central journal article supplement (PMC7830706; doi:10.3390/insects12010071), 2021-01-14
Supplement: insects-12-00071-s001.pdf [file insects-12-00071-s001.pdf]

**Table S1.** Primers used for the sodium channel gene mutation analysis

| <b>Mutation</b> | <b>Primer</b> | <b>Sequence (5'→3')</b> |
|-----------------|---------------|-------------------------|
| V1016I          | V1016G-For    | GCCACCGTAGTGATAGGAAATC  |
|                 | V1016G-Rev    | CGGGTTAAGTTTCGTTTAGTAGC |
|                 | V1016G-V      | GTTTCCCACCTCGCACAGGT    |
|                 | V1016G-I      | GTTTCCCACCTCGCACAGATA   |
| F1534C          | F1534C-For    | GGAGAACTACACGTGGGAGAAC  |
|                 | F1534C-Rev    | CGCCACTGAAATTGAGAATAGC  |
|                 | F1534C-F      | GCGTGAAGAACGACCCGA      |
|                 | F1534C-C      | GCGTGAAGAACGACCCGC      |

**Table S2.** Primer sequences for gene expression studies and detection of DENV

| <b>Gene</b>       | <b>Gene ID</b> | <b>Sequence (5'→3')</b> |
|-------------------|----------------|-------------------------|
| cytochrome p450 F | AAEL011463     | TTTCGATGTACGGTTGGACA    |
| cytochrome p450 R | AAEL011463     | GCTTTCGATACGCTGGAGTC    |
| CYP325N1 F        | AAEL012770     | GTACCTTGAAGCGCAAGAGG    |
| CYP325N1 R        | AAEL012770     | TG TTCAGCATT CCTTGCTTG  |
| CYP6N12 F         | AAEL009124     | T TCACTTGCGCGATCACTAC   |
| CYP6N12 R         | AAEL009124     | TGCAGCAATTT CCTCAACAG   |
| CYP9J27 F         | AAEL014616     | ACGGCAAGAAAATGATGGAC    |
| CYP9J27 R         | AAEL014616     | CGGTTCCATGACTCTCCCTA    |
| CYP12A2 F         | AAEL002005     | TACATCGTTGACTCCGGACA    |
| CYP12A2 R         | AAEL002005     | CGAAGCGATCACTTTGTTGA    |

|          |            |                        |
|----------|------------|------------------------|
| GSTD1 F  | AAEL001061 | GGTTCAGCTTGAGGAACTCG   |
| GSTD1 R  | AAEL001061 | TGGCGTGGAGCTGAATCTTA   |
| GSTD5 F  | AAEL001071 | GCAAGCCAAAGTCAACGAAAG  |
| GSTD5 R  | AAEL001071 | CGTAGACCTGCTCGTGATAGTA |
| S7 F     | AY380336   | ACAAGAACCAGCAGACCAC    |
| S7 R     | AY380336   | TCCGGGAATTCGAACGTAAC   |
| DENV-1 F | EU482591   | GACACCACACCCTTTGGACAA  |
| DENV-1 R | EU482591   | CACCTGGCTGTCACCTCCAT   |

**Table S3.** The average pupation time for the *Ae. aegypti* populations

| Population | Total  |                 | males  |                 | females |                 |
|------------|--------|-----------------|--------|-----------------|---------|-----------------|
|            | Number | Average<br>days | Number | Average<br>days | Number  | Average<br>days |
| p-s        | 179    | 6.2521368       | 89     | 6.1916667       | 90      | 6.6956522       |
| Key West   | 186    | 6.0243902       | 95     | 5.8581081       | 91      | 6.5263158       |
